# Supplementary material for: Mongolia health situation: based on the Global Burden of Disease Study 2019
Source: Springer Nature journal article supplement (doi:10.1186/s12889-021-12070-3), 2022-01-04
Supplement: MOESM1 [file 19999402]

Annex 1. List of International Classification of Diseases (ICD) codes mapped

| Disease                                           | ICD Code                                                                                                                                                                                                                                                                                                                                                                                                                                                                                          |
|---------------------------------------------------|---------------------------------------------------------------------------------------------------------------------------------------------------------------------------------------------------------------------------------------------------------------------------------------------------------------------------------------------------------------------------------------------------------------------------------------------------------------------------------------------------|
| Age-related and other hearing loss                | H71-H75.83, H80-H80.93, H83-H83.93, H90-H91, H91.1-H91.93, H94-H94.83, Q16-Q16.9                                                                                                                                                                                                                                                                                                                                                                                                                  |
| Alcohol use disorders                             | E24.4, F10-F10.99, G31.2, G62.1, R78.0, X45-X45.9, X65-X65.9, Y15-Y15.9, Z81.1                                                                                                                                                                                                                                                                                                                                                                                                                    |
| Alzheimer's disease and other dementias           | F00-F02.0, F02.8-F03.91, F06.2, G30-G31.1, G31.8-G32.89                                                                                                                                                                                                                                                                                                                                                                                                                                           |
| Anxiety disorders                                 | F40-F44.9, F93-F93.2                                                                                                                                                                                                                                                                                                                                                                                                                                                                              |
| Bipolar disorder                                  | F30-F31.9, F34.0                                                                                                                                                                                                                                                                                                                                                                                                                                                                                  |
| Blindness and vision impairment                   | H25-H28.8, H31-H36.8, H40-H40.9, H42-H42.8, H46-H54.9                                                                                                                                                                                                                                                                                                                                                                                                                                             |
| Breast cancer                                     | C50-C50.629, C50.8-C50.929, Z12.3-Z12.39, Z80.3, Z85.3, Z86.000                                                                                                                                                                                                                                                                                                                                                                                                                                   |
| Cardiomyopathy and myocarditis                    | B33.2-B33.20, B33.22-B33.24, D86.85, I40-I41.8, I42-I43.8, I51.4-I51.6                                                                                                                                                                                                                                                                                                                                                                                                                            |
| Cervical cancer                                   | C53-C53.9, Z12.4, Z85.41                                                                                                                                                                                                                                                                                                                                                                                                                                                                          |
| Chronic kidney disease                            | D63.1, E08.2-E08.29, E10.2-E10.29, E11.2-E11.29, E12.2, E13.2-E13.29, E14.2, I12-I13.9, N02-N08.8, N15.0, N17-N19, Q60-Q63.2, Q63.8-Q63.9, Q64.2-Q64.9, Z49-Z49.32, Z52.4, Z99.2                                                                                                                                                                                                                                                                                                                  |
| Chronic obstructive pulmonary disease             | J41-J42.4, J43-J44.9                                                                                                                                                                                                                                                                                                                                                                                                                                                                              |
| Cirrhosis and other chronic liver diseases        | I85-I85.9, I98.2, K70-K71, K71.3-K72, K72.1-K75, K75.2, K75.4-K76.2, K76.4-K77.8, R16-R18.9, Z52.6, Z94.4                                                                                                                                                                                                                                                                                                                                                                                         |
| Colon and rectum cancer                           | C18-C19.0, C20, C21-C21.8, Z12.1-Z12.13, Z85.03-Z85.048, Z86.010                                                                                                                                                                                                                                                                                                                                                                                                                                  |
| Congenital birth defects                          | G71.2, P96.0, Q00-Q07.9, Q10-Q15.9, Q17-Q18.9, Q20-Q28.9, Q30-Q45.9, Q50-Q56.4, Q63.3, Q64-Q64.19, Q65-Q87.89, Q89-Q89.8, Q90-Q93.9, Q95-Q99.9, Z13.7-Z13.79, Z14-Z15.89, Z82.7-Z82.79, Z87.7-Z87.798                                                                                                                                                                                                                                                                                             |
| Depressive disorder                               | F32-F33.9, F34.1                                                                                                                                                                                                                                                                                                                                                                                                                                                                                  |
| Dermatitis                                        | L20-L23.2, L23.4-L27, L27.2-L27.9, L30-L30.2, L30.5-L30.9                                                                                                                                                                                                                                                                                                                                                                                                                                         |
| Diabetes mellitus                                 | E08-E08.11, E08.3-E08.9, E10-E10.11, E10.3-E11.1, E11.3-E12.1, E12.3-E13.11, E13.3-E14.1, E14.3-E14.9, R73-R73.9, Z13.1, Z83.3                                                                                                                                                                                                                                                                                                                                                                    |
| Diarrheal diseases                                | A00-A00.9, A02-A02.0, A02.8-A07, A07.2-A07.4, A08-A08.8, A09, K52.1, Z22.1, Z23.0                                                                                                                                                                                                                                                                                                                                                                                                                 |
| Dietary iron deficiency                           | D50-D50.9                                                                                                                                                                                                                                                                                                                                                                                                                                                                                         |
| Drowning                                          | W65-W70.9, W73-W74.9                                                                                                                                                                                                                                                                                                                                                                                                                                                                              |
| Drug use disorders                                | F11-F19.99, P96.1, R78.1-R78.9, Z81.2-Z81.4                                                                                                                                                                                                                                                                                                                                                                                                                                                       |
| Endocrine, metabolic, blood, and immune disorders | C7A00-C7B8, D3A00-D3A8, D66-D69.49, D69.6-D70.0, D70.4-D77, D80-D84.9, D86.8, D86.82-D86.84, D86.86-D86.89, D89-D89.2, D89.8, D89.82-D89.9, E03-E03.1, E03.3-E06.3, E06.5-E07.9, E15-E16, E16.1-E16.9, E20-E23.0, E23.2-E24.1, E24.3, E24.8-E27.2, E27.4-E28.1, E28.3-E32.9, E34, E34.1-E35.8, E65-E66.09, E66.2-E68, E70-E80.09, E80.3-E85.9, E88-E88.9, E90-E998, Z83.4-Z83.49                                                                                                                  |
| Environmental heat and cold exposure              | L55-L55.9, L58-L58.9, W88-W94.9, W97.9, W99-W99.9, X30-X32.9, X39-X39.9                                                                                                                                                                                                                                                                                                                                                                                                                           |
| Esophageal cancer                                 | C15-C15.9, Z85.01                                                                                                                                                                                                                                                                                                                                                                                                                                                                                 |
| Exposure to mechanical forces                     | W20-W38.9, W40-W43.9, W45.0-W45.2, W46-W46.2, W49-W52                                                                                                                                                                                                                                                                                                                                                                                                                                             |
| Falls                                             | W00-W19.9                                                                                                                                                                                                                                                                                                                                                                                                                                                                                         |
| Fire, heat, and hot substances                    | X00-X06.9, X08-X19.9                                                                                                                                                                                                                                                                                                                                                                                                                                                                              |
| Foreign body                                      | H02.81-H02.819, H44.6-H44.799, M60.2-M60.28, W44-W45, W45.3-W45.9, W75-W76.9, W78-W80.9, W83-W84.9                                                                                                                                                                                                                                                                                                                                                                                                |
| Gynecological diseases                            | B37.3-B37.49, D25-D26, E28.2, N61-N64.9, N72-N72.0, N75-N77.8, N80-N81.9, N83-N84, N84.2-N86, N88-N95.9, N97-N98.9, R30-R37, R39-R39.9, R87-R87.9, Z01.4-Z01.7, Z31-Z31.9, Z86.1-Z86.19, Z87.4-Z87.448                                                                                                                                                                                                                                                                                            |
| Headache disorder                                 | G43-G44.89                                                                                                                                                                                                                                                                                                                                                                                                                                                                                        |
| Hypertensive heart diseases                       | I11-I11.2, I11.9                                                                                                                                                                                                                                                                                                                                                                                                                                                                                  |
| Idiopathic epilepsy                               | G40-G41.9, Z82.0                                                                                                                                                                                                                                                                                                                                                                                                                                                                                  |
| Interpersonal violence                            | T74.2-T76.22, X85-Y08.9, Y87.1-Y87.2                                                                                                                                                                                                                                                                                                                                                                                                                                                              |
| Ischemic heart disease                            | I20-I21.6, I21.9-I25.9, Z82.4-Z82.49                                                                                                                                                                                                                                                                                                                                                                                                                                                              |
| Liver cancer                                      | C22-C22.4, C22.7-C22.9, Z85.05                                                                                                                                                                                                                                                                                                                                                                                                                                                                    |
| Low back pain                                     | G54.4, M47.015-M47.019, M47.15-M47.18, M47.25-M47.28, M47.815-M47.818, M47.896-M47.899, M48.05-M48.08, M48.16-M48.19, M48.25-M48.27, M48.35-M48.38, M48.45-M48.48, M48.55-M48.58, M49.85-M49.88, M51.05-M51.07, M51.15-M51.17, M51.25-M51.27, M51.35-M51.37, M51.45-M51.47, M51.85-M51.87, M53.3, M53.85-M53.88, M54.05-M54.09, M54.15-M54.18, M54.3-M54.5, M99.03-M99.04, M99.13-M99.14, M99.23-M99.24, M99.33-M99.34, M99.43-M99.44, M99.53-M99.54, M99.63-M99.64, M99.73-M99.74, M99.83-M99.84 |
| Lower respiratory infections                      | A48.1, A70, B96.0-B96.1, B97.21, B97.4-B97.6, J09-J18.2, J18.8-J18.9, J19.6-J22.9, J85.1, J91.0, P23-P23.9, U04 -U04.9, Z25.1                                                                                                                                                                                                                                                                                                                                                                     |
| Neck pain                                         | G54.2, M47.011-M47.013, M47.11-M47.13, M47.21-M47.23, M47.811-M47.813, M47.892-M47.894, M48.01-M48.03, M48.12-M48.14, M48.21-M48.23, M48.31-M48.33, M48.41-M48.43, M48.51-M48.53, M49.81-M49.83, M50-M50.93, M53.0-M53.1, M53.81-M53.83, M54.01-M54.03, M54.11-M54.13, M54.2, M54.81, M99.01, M99.11, M99.21, M99.31, M99.41, M99.51, M99.61, M99.71, M99.81                                                                                                                                      |

|                                               |                                                                                                                                                                                                                                                                                                                                                                                                                                                                                                                                                                                                                                                                                                                                                                                                                                                                                                                                                             |
|-----------------------------------------------|-------------------------------------------------------------------------------------------------------------------------------------------------------------------------------------------------------------------------------------------------------------------------------------------------------------------------------------------------------------------------------------------------------------------------------------------------------------------------------------------------------------------------------------------------------------------------------------------------------------------------------------------------------------------------------------------------------------------------------------------------------------------------------------------------------------------------------------------------------------------------------------------------------------------------------------------------------------|
| Neonatal disorders                            | A40.1, B95.1, P00-P05.9, P07-P15.9, P19-P22.9, P24-P29.9, P36-P36.9, P38-P39.9, P50-P61.9, P70-P72.9, P74-P74.9, P75.0-P78.9, P80-P81.9, P83-P84, P90-P92.9, P94-P94.9, P96, P96.3-P96.4, P96.8-P96.9, P99.9                                                                                                                                                                                                                                                                                                                                                                                                                                                                                                                                                                                                                                                                                                                                                |
| Oral disorders                                | K00-K08.499, K08.8-K14.9, M26-M27.9, Z01.2-Z01.21, Z13.84, Z96.5                                                                                                                                                                                                                                                                                                                                                                                                                                                                                                                                                                                                                                                                                                                                                                                                                                                                                            |
| Osteoarthritis                                | M16-M18.9                                                                                                                                                                                                                                                                                                                                                                                                                                                                                                                                                                                                                                                                                                                                                                                                                                                                                                                                                   |
| Other malignant cancers                       | C17-C17.9, C30-C31.9, C37-C38.8, C40-C41.9, C47-C4A, C51-C52.9, C57-C57.8, C58-C58.0, C60-C60.9, C63-C63.8, C66-C66.9, C68.0-C68.8, C69-C69.9, C74-C75.8, D07.4, D09.2, D13.2-D13.3, D14.0, D15-D16.9, D28.0-D28.1, D28.7, D29.0, D30.2, D30.4-D30.8, D31-D31.9, D35-D35.2, D35.5-D36, D36.1-D36.7, D37.2, D38.2-D38.5, D39.2, D39.8, D41.2-D41.3, D44.1-D44.8, D48.0-D48.4                                                                                                                                                                                                                                                                                                                                                                                                                                                                                                                                                                                 |
| Other mental disorders                        | F04-F06.1, F06.3-F07.0, F08-F09.9, F21-F24, F26-F29.9, F34, F34.8-F34.9, F38-F39, F45-F49, F51-F52.9, F55-F55.8, F56-F69.0, F80-F89.0, F93.3-F99.0, G47-G47.29, G47.4-G47.9, R40-R40.4, R45-R46.89, R55-R55.0, Z03.2, Z04.6-Z04.72, Z13.4, Z64, Z81, Z81.8, Z86.5-Z86.59                                                                                                                                                                                                                                                                                                                                                                                                                                                                                                                                                                                                                                                                                    |
| Other musculoskeletal disease                 | G54.3, I27.1, L93-L93.2, M00-M03.6, M06-M07.69, M11-M15.9, M19-M19.93, M20-M25.9, M30-M32.9, M34-M36.8, M40-M43.9, M45-M47.01, M47.014, M47.02-M47.10, M47.14, M47.2-M47.20, M47.24, M47.8-M47.81, M47.814, M47.819-M47.891, M47.895, M47.9-M48.00, M48.04, M48.1-M48.11, M48.15, M48.2-M48.20, M48.24, M48.3-M48.30, M48.34, M48.4-M48.40, M48.44, M48.5-M48.50, M48.54, M48.8-M49, M49.2-M49.80, M49.84, M49.89, M51-M51.04, M51.1-M51.14, M51.2-M51.24, M51.3-M51.34, M51.4-M51.44, M51.8-M51.84, M51.9, M53, M53.2, M53.8-M53.80, M53.84, M53.9-M54.00, M54.04, M54.1-M54.10, M54.14, M54.6-M54.8, M54.89-M54.9, M61-M63.89, M65-M68.8, M70-M72.4, M72.8-M73, M75-M77.9, M79-M79.676, M79.8-M87.09, M87.2-M89.59, M89.7-M95.9, M99-M99.00, M99.02, M99.05-M99.10, M99.12, M99.15-M99.20, M99.22, M99.25-M99.30, M99.32, M99.35-M99.40, M99.42, M99.45-M99.50, M99.52, M99.55-M99.60, M99.62, M99.65-M99.70, M99.72, M99.75-M99.80, M99.82, M99.85-M99.9 |
| Road injuries                                 | V01-V04.99, V06-V80.929, V82-V82.9, V87.2-V87.3                                                                                                                                                                                                                                                                                                                                                                                                                                                                                                                                                                                                                                                                                                                                                                                                                                                                                                             |
| Schizophrenia                                 | F20-F20.9, F25-F25.9                                                                                                                                                                                                                                                                                                                                                                                                                                                                                                                                                                                                                                                                                                                                                                                                                                                                                                                                        |
| Self-harm                                     | X60-X64.9, X66-X84.9, Y87.0                                                                                                                                                                                                                                                                                                                                                                                                                                                                                                                                                                                                                                                                                                                                                                                                                                                                                                                                 |
| Sexually transmitted infections excluding HIV | A50-A60.9, A63-A64.0, B63, I98.0, K67.0-K67.2, M73.0-M73.8, N70-N71.9, N73-N74, N74.2-N74.8, Z11.3, Z20.2, Z22.4                                                                                                                                                                                                                                                                                                                                                                                                                                                                                                                                                                                                                                                                                                                                                                                                                                            |
| Stomach cancer                                | C16-C16.9, Z12.0, Z85.02-Z85.028                                                                                                                                                                                                                                                                                                                                                                                                                                                                                                                                                                                                                                                                                                                                                                                                                                                                                                                            |
| Stroke                                        | G45-G46.8, I60-I62, I62.9-I64, I64.1, I65-I69.998, Z82.3                                                                                                                                                                                                                                                                                                                                                                                                                                                                                                                                                                                                                                                                                                                                                                                                                                                                                                    |
| Tracheal, bronchus, and lung cancer           | C33, C34-C34.92, Z12.2, Z80.1-Z80.2, Z85.1-Z85.20                                                                                                                                                                                                                                                                                                                                                                                                                                                                                                                                                                                                                                                                                                                                                                                                                                                                                                           |
| Tuberculosis                                  | A10-A14, A15 -A18.89, A19-A19.9, B90-B90.9, K67.3, K93.0, M49.0, N74.0-N74.1, P37.0, U84.3, Z03.0, Z11.1, Z20.1, Z23.2                                                                                                                                                                                                                                                                                                                                                                                                                                                                                                                                                                                                                                                                                                                                                                                                                                      |
| Upper digestive system diseases               | K21-K21.9, K22.7-K22.719, K25-K30, R12                                                                                                                                                                                                                                                                                                                                                                                                                                                                                                                                                                                                                                                                                                                                                                                                                                                                                                                      |
| Vitamin A deficiency                          | E50-E50.9, E64.1                                                                                                                                                                                                                                                                                                                                                                                                                                                                                                                                                                                                                                                                                                                                                                                                                                                                                                                                            |

Annex 2. Data source used for estimation of burden of diseases in Mongolia

- 1 Allen RW, Gombojav E, Barkhaargachaa B, Byambaa T, Lkhasuren O, Amran O, Takaro TK, Janes CR. An assessment of air pollution and its attributable mortality in Ulaanbaatar, Mongolia. *Air Qual Atmos Health*. 2013; 6(1): 137-50 as it appears in Shaddick G, Thomas ML. Particulate Matter 2.5 and 10 Surface Monitor Station Expanded Database 2008-2017. [Unpublished]
- 2 Basanahu J, Johnson GJ, Burkhardt G, Minassian DC. Prevalence and causes of blindness and visual impairment in Mongolia: a survey of populations aged 40 years and older. *Bull World Health Organ*. 1994; 72(5): 771-6
- 3 Bastarckhuu O, Kim DY, Aha SH, Nymadawa P, Dagvaakhvori Y, Shagdarsuren M, Park JY, Choi JW, Oyumbilgy J, Oyunsuren T, Han KH. Prevalence and genotype distribution of hepatitis C virus among apparently healthy individuals in Mongolia: a population-based nationwide study. *Liver Int*. 2008; 28(10): 1389-95
- 4 Bayasgalan G, Narantseth D, Litvintseva E, Sukhbaatar P, Rakhnazar J, Rowe P. Clinical patterns and major causes of infertility in Ulaanbaatar, Mongolia. *Gynecol Res*. 2004; 30(5): 386-93
- 5 Bellizzi S, Alt MM, Abalos E, Nyman AP, Kapila J, Piegger-Castro C, Vogel JP, Meraldi M. Are hypertensive disorders in pregnancy associated with congenital malformations in offspring? Evidence from the WHO Multicountry cross sectional survey on maternal and newborn health. *BMC Pregnancy Childbirth*. 2016; 16(1): 198
- 6 Bhattarai VK, Zuparsky A, Blencowe H, Khanna R, Sgro M, Ebbesen F, Bell J, Mori R, Slusher TM, Fahmy N, Paul VK, Du L, Okolo AA, de Almeida MF, Olysanba BO, Kumar P, Couzens S, Lawn JE. Neonatal hyperbilirubinemia and Rhesus disease of the newborn: incidence and impairment estimates for 2010 at regional and global levels. *Pediatr Res*. 2013; 74(Suppl 1): 86-100
- 7 BP. *International Review of World Energy*. London, United Kingdom; BP; 2016
- 8 British Geological Survey. *Natural Environment Research Council World Mineral Production 2007*. Nottingham, United Kingdom: British Geological Survey, Natural Environment Research Council; 2013
- 9 Centers for Disease Control and Prevention (CDC) and World Health Organization (WHO). *Mongolia Global Youth Tobacco Survey 2003*. Atlanta, United States: Centers for Disease Control and Prevention (CDC)
- 10 Centers for Disease Control and Prevention (CDC) and World Health Organization (WHO). *Mongolia Global Youth Tobacco Survey 2007*. United States: Centers for Disease Control and Prevention (CDC); 2007
- 11 Centers for Disease Control and Prevention (CDC), Ministry of Health (Mongolia), United Nations Children's Fund (UNICEF), World Health Organization (WHO). *Mongolia Survey Assessing the Nutritional Consequences of the Dzaud 2001*
- 12 Centers for Disease Control and Prevention (CDC), National Center for Public Health (Mongolia), World Health Organization (WHO). *Mongolia Global Youth Tobacco Survey 2014*. Atlanta, United States of America: Centers for Disease Control and Prevention (CDC)
- 13 Centers for Disease Control and Prevention (CDC), Public Health Institute, Ministry of Health (Mongolia), World Health Organization (WHO). *Mongolia Global School-Based Student Health Survey 2010*
- 14 Centers for Disease Control and Prevention (CDC), World Health Organization (WHO). *Mongolia Global School-Based Student Health Survey 2013*
- 15 Chitsulo L, Engels D, Montreux A, Savoli L. The global status of schistosomiasis and its control. *Acta Trop*. 2000; 77(1): 41-51
- 16 Cystic Echinococcosis Endemicity Estimates identified through systematic review and personal communication, as provided by GRD 2015 expert. [Unpublished]
- 17 Damandip C, Sinscher Poo V, Binet T, Messouli M, Chou M, Wang J, Pape J-W, Avasthi S, Baidokar A, Rakoto-Andrianarivo M, Sylla M, Nymadawa P, Rasmundo G, Komrarin-Pradei F, Endor H, Pramoth-Baccali G, Vanhems P. For The Gabriel Network null. Burden of Influenza in Less Than 5-Year-Old Children Admitted to Hospital with Pneumonia in Developing and Emerging Countries: A Descriptive, Multicenter Study. *Am J Trop Med Hyg*. 2018; 98(6): 1805-10
- 18 Davaaalkhum D, Ojima T, Nymadawa P, Tsed N, Lkhagsuren T, Wiersma S, Ukhara R, Watanabe M, Oki I, Nakamura Y. Seroprevalence of *Brucella* B virus infection among children in Mongolia: results of a nationwide survey. *Pediatr Int*. 2007; 49(3): 368-74
- 19 Development Economics Data Group (DECDG), World Bank, National Statistical Office of Mongolia. *Mongolia Population and Housing Census 1999*
- 20 Development Economics Data Group (DECDG), World Bank, National Statistical Office of Mongolia. *Mongolia Population and Housing Census 1969*
- 21 Development Economics Data Group (DECDG), World Bank, National Statistical Office of Mongolia. *Mongolia Population and Housing Census 1979*
- 22 Dugee O, Khor GL, Lye M-S, Lavusamyam L, Janchiv O, Jambyan B, Esa N. Association of major dietary patterns with obesity risk among Mongolian men and women. *Asia Pac J Clin Nutr*. 2009; 18(3): 433-40
- 23 European Centre for Medium-Range Weather Forecasts (ECMWF), European Reanalysis-. United Kingdom: European Centre for Medium-Range Weather Forecasts (ECMWF)
- 24 FAO Supply Utilization Accounts 1961-2013. Personal Communication with Dr. Josef Schmullhofer, 2016. [Unpublished]
- 25 Feenstra, Robert C., Robert Inklaar and Marcel P. Timmer (2015), "The Next Generation of the Penn World Table" American Economic Review, 105(10), 3150-3182, available for download at www.gdpc.net/pwt
- 26 Food and Agriculture Organization of the United Nations (FAO). FAOSTAT Commodity Balances - Crops Primary Equivalent. Rome, Italy: Food and Agriculture Organization of the United Nations (FAO)
- 27 Food and Agriculture Organization of the United Nations (FAO). FAOSTAT Food Balance Sheets. October 2014. Rome, Italy: Food and Agriculture Organization of the United Nations (FAO)
- 28 Food Fortification Initiative (United States), Global Alliance for Improved Nutrition (GAIN), Iodine Global Network (Canada), Micronutrient Forum (Canada), Global Fortification Data Exchange: Legislation and Standards, Year When Food Fortification Mandated, and Count of Nutrients In Fortification Standards
- 29 Foster PJ, Basanahu J, Abdirik PH, Munkhbayar D, Uranchimeg D, Johnson GJ. Glaucoma in Mongolia. A population-based survey in Hövsgöl province, northern Mongolia. *Arch Ophthalmol*. 1996; 114(10): 1235-41
- 30 Fose Y, Igarashi T, Yamada C, Sakano S, Ito H, Umenai T, Ito M. Epidemiological survey of thyroid volume and iodine intake in schoolchildren, postpartum women and neonates living in Ulaanbaatar. *Clin Endocrinol (Oxf)*. 2003; 59(3): 298-306 as it appears in World Health Organization (WHO). WHO Global Database on Iodine Deficiency. Geneva, Switzerland: World Health Organization (WHO)
- 31 Gallup. *Mongolia World Poll 2011*
- 32 Gallup. *Mongolia World Poll 2012*
- 33 Global Burden of Disease 2010 Expert Group Working Document on Sense and Hearing Disorders.
- 34 Global Burden of Disease Collaborative Network. *Global Burden of Disease Study 2016 (GBD 2016) Covariates 1980-2016*. Seattle, United States: Institute for Health Metrics and Evaluation (IHME), 2017
- 35 Global Burden of Disease Collaborative Network. *Global Burden of Disease Study 2017 (GBD 2017) Cause-Specific Mortality 1987-2017*. Seattle, United States: Institute for Health Metrics and Evaluation (IHME), 2018
- 36 Global Burden of Disease Collaborative Network. *Global Health Spending 1995-2017*. Seattle, United States of America: Institute for Health Metrics and Evaluation (IHME), 2020
- 37 Government of Mongolia, National Center for Communicable Diseases (Mongolia), Research Institute of Tuberculosis/Japan Aids Tuberculosis Association (RI/TJATA), Mongolia World Health Organization (WHO). *Mongolia National Tuberculosis Prevalence Survey 2014-2015*
- 38 Government of Mongolia, National Statistical Office of Mongolia, United Nations Children's Fund (UNICEF), United Nations Population Fund (UNFPA), Mongolia Multiple Indicator Cluster Survey 2013. New York, United States of America: United Nations Children's Fund (UNICEF), 2016
- 39 International Centre for Eye Health (ICEH). *Mongolia Rapid Assessment of Avoidable Blindness Survey 2013*. Grootebroek, Netherlands: RAAB Institute, 2014
- 40 International Fuel Quality Center (IFQC). *Overview of Loaded Gasoline and Sulfur Levels in Gasoline and Diesel - 2002*
- 41 International Labour Organization (ILO), National Statistical Office of Mongolia. *Mongolia Labor Force Survey 2008-2009*. Ulaanbaatar, Mongolia: National Statistical Office of Mongolia
- 42 International Organization (ILO), National Statistical Office of Mongolia. *Mongolia Labor Force Survey 2010*. Ulaanbaatar, Mongolia: National Statistical Office of Mongolia
- 43 International Labour Organization (ILO), National Statistical Office of Mongolia. *Mongolia Labor Force Survey 2012*. Ulaanbaatar, Mongolia: National Statistical Office of Mongolia
- 44 International Labour Organization (ILO), National Statistical Office of Mongolia. *Mongolia Labor Force Survey 2013*. Ulaanbaatar, Mongolia: National Statistical Office of Mongolia
- 45 International Labour Organization (ILO), National Statistical Office of Mongolia. *Mongolia Labor Force Survey 2014*. Ulaanbaatar, Mongolia: National Statistical Office of Mongolia
- 46 International Labour Organization (ILO), National Statistical Office of Mongolia. *Mongolia Labor Force Survey with Child Labor Survey 2002-2003*. Ulaanbaatar, Mongolia: National Statistical Office of Mongolia
- 47 International Labour Organization (ILO), National Statistical Office of Mongolia. *Mongolia Labor Force Survey with Child Labor Survey 2006-2007*. Ulaanbaatar, Mongolia: National Statistical Office of Mongolia
- 48 International Labour Organization (ILO), National Statistical Office of Mongolia. *Mongolia Labor Force Survey with Informal Sector Survey 2007-2008*. Ulaanbaatar, Mongolia: National Statistical Office of Mongolia
- 49 International Labour Organization (ILO), International Labour Organization Database (ILOSTAT) - Employment by Sex and Economic Activity. International Labour Organization (ILO)
- 50 International Labour Organization (ILO), International Labour Organization Database (ILOSTAT) - Employment by Sex and Occupation. International Labour Organization (ILO)
- 51 International Labour Organization (ILO), International Labour Organization Database (ILOSTAT) - Employment to Population Ratio by Sex and Age. International Labour Organization (ILO)
- 52 International Monetary Fund (IMF). *World Economic Outlook Database*. Washington, D.C., United States of America: International Monetary Fund (IMF)
- 53 International Road Federation. *World Road Statistics 1963-1999*. Geneva, Switzerland: International Road Federation
- 54 International Road Federation. *World Road Statistics 2009 Database and World Road Statistics 2007*
- 55 International Road Federation. *World Road Statistics 2015*. Geneva, Switzerland: International Road Federation, 2015
- 56 International Road Federation. *World Road Statistics 2018*. Geneva, Switzerland: International Road Federation, 2018
- 57 International Road Federation. *World Road Statistics 2019*. Geneva, Switzerland: International Road Federation, 2019
- 58 International Society of Nephrology (ISN), Mongolia - Ulaanbaatar International Society of Nephrology Kidney Disease Data Center Chronic Kidney Disease and Cardiovascular Risk Survey 2007
- 59 Joint United Nations Program on HIV/AIDS (UNAIDS), United Nations Children's Fund (UNICEF), World Health Organization (WHO), Mongolia Global AIDS Response Progress Reporting (GARPP) System - Antenatal Care Attendees Positive for Syphilis
- 60 Kachondham Y, Phamthana S, Oyumbilgy M, Brown L. Child health and nutritional status in Ulaanbaatar, Mongolia: a preliminary assessment. *Asia Pac J Public Health*. 1992; 6(4): 226-32 as it appears in World Health Organization (WHO). WHO Global Database on Child Growth and Malnutrition - Historical. Geneva, Switzerland: World Health Organization (WHO)
- 61 Kiriakova NY, Fedotova EA, Narantseth D, Bayanbulag B, Enkhbaatar D, Denkin VV, Nymadawa P. Structure of the M-tuberculosis Population in Mongolia According to the Results of Genotyping of Large-scale Polymorphisms. *Mol Genet Microbiol*. 2011; 26(4): 141-5
- 62 Liu Z, Huang Y, Chen X, Cheng H, Luo X. A cross-sectional study of 4 mental disorders in Chifeng City of Inner Mongolia Autonomous Region. *Chin Ment Health J*. 2015; 29(9): 678-84
- 63 London School of Hygiene and Tropical Medicine. *Global Atlas of Helminth Infections - Soil Transmitted Helminths*. London, United Kingdom: London School of Hygiene and Tropical Medicine
- 64 Maddison Project Database, version 2018. Belle, Janita, Robert Inklaar, Herman de Jong and Jan Lutjen van Zanden (2018), "Rebasin 'Maddison': new income comparisons and the shape of long-run economic development", Maddison Project Working paper 10
- 65 Malaria Atlas Project. *Sickle Haemoglobin (Hb) Allele Frequency Layer*. Oxford, United Kingdom: Malaria Atlas Project, 2013
- 66 Max Planck Institute for Demographic Research, Vienna Institute of Demography. *Human Fertility Collection - ASFR, original age scale*. Rostock, Germany: Max Planck Institute for Demographic Research
- 67 Mensahkhan J, Watt JP, Niyonkore P, Edmond K, Lin DJ, Nymadawa P, Yang Bayanar, Altantsatsog D, Slack M, Chidlow B. Bacterial Meningitis in Ulaanbaatar, Mongolia, 2002-2004. *Clin Infect Dis*. 2009; 48 Suppl 2(Suppl 2): S141-6
- 68 Ministry of Health (Mongolia), National Statistical Office of Mongolia, United Nations Population Fund (UNFPA), Mongolia Reproductive Health Survey 2003. Ulaanbaatar, Mongolia: National Statistical Office of Mongolia, 2004
- 69 Ministry of Health (Mongolia), National Statistical Office of Mongolia. *Mongolia Reproductive Health Survey 2008*. Ulaanbaatar, Mongolia: National Statistical Office of Mongolia
- 70 Ministry of Health (Mongolia). *Mongolia Health Indicators 2001*. Ulaanbaatar, Mongolia: Ministry of Health (Mongolia)
- 71 Ministry of Health (Mongolia). *Mongolia Health Indicators 2003*. Ulaanbaatar, Mongolia: Ministry of Health (Mongolia)
- 72 Ministry of Health (Mongolia). *Mongolia Health Indicators 2006*. Ulaanbaatar, Mongolia: Ministry of Health (Mongolia)
- 73 Ministry of Health (Mongolia). *Mongolia Health Indicators 2007*. Ulaanbaatar, Mongolia: Ministry of Health (Mongolia)
- 74 Ministry of Health (Mongolia). *Mongolia Sexually Transmitted Infections among Pregnant Women Attending Antenatal Clinics 2008*
- 75 Ministry of Health and Social Welfare (Myanmar), National Statistical Office of Mongolia, United Nations Population Fund (UNFPA), Myanmar Fertility and Reproductive Health Survey 2006-2007
- 76 Ministry of Immigration and Population (Myanmar), United Nations Population Fund (UNFPA). *Myanmar Fertility and Reproductive Health Survey 2006-2007*. [Unpublished]
- 77 Mongolia - Ulaanbaatar Air Quality Monitoring Network 2011 as it appears in Shaddick G, Thomas ML. Particulate Matter 2.5 and 10 Surface Monitor Station Expanded Database 2008-2017. [Unpublished]
- 78 Mongolia - Ulaanbaatar Air Quality Monitoring Network 2012 as it appears in Shaddick G, Thomas ML. Particulate Matter 2.5 and 10 Surface Monitor Station Expanded Database 2008-2017. [Unpublished]
- 79 Mongolia - Ulaanbaatar Air Quality Monitoring Network 2013 as it appears in Shaddick G, Thomas ML. Particulate Matter 2.5 and 10 Surface Monitor Station Expanded Database 2008-2017. [Unpublished]
- 80 Mongolia - Ulaanbaatar Air Quality Monitoring Network 2014 as it appears in Shaddick G, Thomas ML. Particulate Matter 2.5 and 10 Surface Monitor Station Expanded Database 2008-2017. [Unpublished]
- 81 Mongolia - Ulaanbaatar Air Quality Monitoring Network 2015 as it appears in Shaddick G, Thomas ML. Particulate Matter 2.5 and 10 Surface Monitor Station Expanded Database 2008-2017. [Unpublished]
- 82 Mongolia - Ulaanbaatar AirNow Air Quality Data 2016 as it appears in Shaddick G, Thomas ML. Particulate Matter 2.5 and 10 Surface Monitor Station Expanded Database 2008-2017. [Unpublished]
- 83 Mongolia Child Nutrition Survey 1992 as it appears in World Health Organization (WHO). WHO Global Database on Child Growth and Malnutrition. Geneva, Switzerland: World Health Organization (WHO)
- 84 Mongolia Chronic Kidney Disease Statistics by the Global Burden of Disease 2010 Chronic Kidney Disease Expert Group. [Unpublished]
- 85 Mongolia Iodine Deficiency Disorder Survey 1993 as it appears in World Health Organization (WHO). WHO Global Database on Iodine Deficiency. Geneva, Switzerland: World Health Organization (WHO)
- 86 Mongolia Iodine Deficiency Disorder Survey 2001 as it appears in World Health Organization (WHO). WHO Global Database on Iodine Deficiency. Geneva, Switzerland: World Health Organization (WHO)
- 87 Mongolia National Nutrition Survey in Petry N, Okello F, Harrel RF, Bey E, Werth JP, Moore M, Argall MD, Rohrer F. The Proportion of Anemia Associated with Iron Deficiency in Low, Medium, and High Human Development Index Countries: A Systematic Analysis of National Surveys. *Nutrients*. 2016; 8(11)
- 88 Mongolia Population and Housing Census 1956 as it appears in United Nations Statistics Division (UNSD), United Nations Demographic Yearbook, New York City, United States: United Nations Statistics Division (UNSD)
- 89 Mongolia Population and Housing Census 1989 as it appears in United Nations Statistics Division (UNSD), United Nations Demographic Yearbook, New York City, United States: United Nations Statistics Division (UNSD)
- 90 Mongolia Population and Housing Census 2000 as it appears in United Nations Statistics Division (UNSD), United Nations Demographic Yearbook, New York City, United States: United Nations Statistics Division (UNSD)
- 91 Mongolia Population and Housing Census 2010 as it appears in United Nations Statistics Division (UNSD), United Nations Demographic Yearbook, New York City, United States: United Nations Statistics Division (UNSD)
- 92 Mongolia Vital Registration - Deaths 1994 ICD9 as it appears in World Health Organization (WHO), WHO Mortality Database Version September 2016. Geneva, Switzerland: World Health Organization (WHO), 2016
- 93 Mongolia Vital Registration - Deaths 2016 ICD10 as it appears in World Health Organization (WHO), WHO Mortality Database Version April 2018. Geneva, Switzerland: World Health Organization (WHO), 2018
- 94 Mongolia Vital Registration Death Data 2009 as it appears in United Nations Statistics Division (UNSD), United Nations Demographic Yearbook 2009-2010. New York, United States: United Nations (UN), 2011
- 95 Mongolia Vital Registration Death Data 1965 as it appears in United Nations Statistics Division (UNSD), United Nations Demographic Yearbook, New York City, United States: United Nations Statistics Division (UNSD)
- 96 Mongolia Vital Registration Death Data 1970 as it appears in United Nations Statistics Division (UNSD), United Nations Demographic Yearbook, New York City, United States: United Nations Statistics Division (UNSD)
- 97 Mongolia Vital Registration Death Data 1975 as it appears in United Nations Statistics Division (UNSD), United Nations Demographic Yearbook, New York City, United States: United Nations Statistics Division (UNSD)
- 98 Mongolia Vital Registration Death Data 1980 as it appears in United Nations Statistics Division (UNSD), United Nations Demographic Yearbook, New York City, United States: United Nations Statistics Division (UNSD)
- 99 Mongolia Vital Registration Death Data 1985 as it appears in United Nations Statistics Division (UNSD), United Nations Demographic Yearbook, New York City, United States: United Nations Statistics Division (UNSD)
- 100 Mongolia Vital Registration Death Data 1987 as it appears in United Nations Statistics Division (UNSD), United Nations Demographic Yearbook - Historical Supplement 1997, New York, United States of America: United Nations (UN)
- 101 Mongolia Vital Registration Death Data 1988 as it appears in United Nations Statistics Division (UNSD), United Nations Demographic Yearbook - Historical Supplement 1997, New York, United States of America: United Nations (UN)
- 102 Mongolia Vital Registration Death Data 1989 as it appears in United Nations Statistics Division (UNSD), United Nations Demographic Yearbook - Historical Supplement 1997, New York, United States of America: United Nations (UN)
- 103 Mongolia Vital Registration Death Data 1990 as it appears in United Nations Statistics Division (UNSD), United Nations Demographic Yearbook, New York City, United States: United Nations Statistics Division (UNSD)
- 104 Mongolia Vital Registration Death Data 1995 as it appears in United Nations Statistics Division (UNSD), United Nations Demographic Yearbook, New York City, United States: United Nations Statistics Division (UNSD)
- 105 Mongolia Vital Registration Death Data 1996 as it appears in United Nations Statistics Division (UNSD), United Nations Demographic Yearbook, New York City, United States: United Nations Statistics Division (UNSD)
- 106 Mongolia Vital Registration Death Data 1997 as it appears in United Nations Statistics Division (UNSD), United Nations Demographic Yearbook, New York City, United States: United Nations Statistics Division (UNSD)
- 107 Mongolia Vital Registration Death Data 1998 as it appears in United Nations Statistics Division (UNSD), United Nations Demographic Yearbook 2006, New York, United States: United Nations (UN), 2008
- 108 Mongolia Vital Registration Death Data 2000 as it appears in United Nations Statistics Division (UNSD), United Nations Demographic Yearbook 2001, New York, United States: United Nations (UN), 2003
- 109 Mongolia Vital Registration Death Data 2001 as it appears in United Nations Statistics Division (UNSD), United Nations Demographic Yearbook, New York City, United States: United Nations Statistics Division (UNSD)
- 110 Mongolia Vital Registration Death Data 2006 as it appears in United Nations Statistics Division (UNSD), United Nations Demographic Yearbook 2006, New York, United States: United Nations (UN), 2008
- 111 Mongolia Vital Registration Death Data 2007 as it appears in United Nations Statistics Division (UNSD), United Nations Demographic Yearbook 2007, New York, United States: United Nations (UN), 2010
- 112 Mongolia Vital Registration Death Data 2008 as it appears in United Nations Statistics Division (UNSD), United Nations Demographic Yearbook 2008, New York, United States: United Nations (UN), 2010
- 113 Mongolia Vital Registration Death Data 2013 as it appears in United Nations Statistics Division (UNSD), United Nations Demographic Yearbook 2013, New York, United States: United Nations (UN), 2014
- 114 Mongolia Vital Registration Death Data 2014 as it appears in United Nations Statistics Division (UNSD), United Nations Demographic Yearbook 2014, New York, United States: United Nations (UN), 2015

115 Mongolia Vial Registration Live Births Data 1955 as it appears in United Nations Statistics Division (UNSD), United Nations Demographic Yearbook - Historical Supplement 1997. New York, United States of America: United Nations (UN)

116 Mongolia Vial Registration Live Births Data 1956 as it appears in United Nations Statistics Division (UNSD), United Nations Demographic Yearbook - Historical Supplement 1997. New York, United States of America: United Nations (UN)

117 Mongolia Vial Registration Live Births Data 1957 as it appears in United Nations Statistics Division (UNSD), United Nations Demographic Yearbook - Historical Supplement 1997. New York, United States of America: United Nations (UN)

118 Mongolia Vial Registration Live Births Data 1958 as it appears in United Nations Statistics Division (UNSD), United Nations Demographic Yearbook - Historical Supplement 1997. New York, United States of America: United Nations (UN)

119 Mongolia Vial Registration Live Births Data 1960 as it appears in United Nations Statistics Division (UNSD), United Nations Demographic Yearbook - Historical Supplement 1997. New York, United States of America: United Nations (UN)

120 Mongolia Vial Registration Live Births Data 1965 as it appears in United Nations Statistics Division (UNSD), United Nations Demographic Yearbook - Historical Supplement 1997. New York, United States of America: United Nations (UN)

121 Mongolia Vial Registration Live Births Data 1978 as it appears in United Nations Statistics Division (UNSD), United Nations Demographic Yearbook - Historical Supplement 1997. New York, United States of America: United Nations (UN)

122 Mongolia Vial Registration Live Births Data 1979 as it appears in United Nations Statistics Division (UNSD), United Nations Demographic Yearbook - Historical Supplement 1997. New York, United States of America: United Nations (UN)

123 Mongolia Vial Registration Live Births Data 1981 as it appears in United Nations Statistics Division (UNSD), United Nations Demographic Yearbook - Historical Supplement 1997. New York, United States of America: United Nations (UN)

124 Mongolia Vial Registration Live Births Data 1983 as it appears in United Nations Statistics Division (UNSD), United Nations Demographic Yearbook - Historical Supplement 1997. New York, United States of America: United Nations (UN)

125 Mongolia Vial Registration Live Births Data 1984 as it appears in United Nations Statistics Division (UNSD), United Nations Demographic Yearbook - Historical Supplement 1997. New York, United States of America: United Nations (UN)

126 Mongolia Vial Registration Live Births Data 1986 as it appears in United Nations Statistics Division (UNSD), United Nations Demographic Yearbook - Historical Supplement 1997. New York, United States of America: United Nations (UN)

127 Mongolia Vial Registration Live Births Data 1987 as it appears in United Nations Statistics Division (UNSD), United Nations Demographic Yearbook - Historical Supplement 1997. New York, United States of America: United Nations (UN)

128 Mongolia Vial Registration Live Births Data 1988 as it appears in United Nations Statistics Division (UNSD), United Nations Demographic Yearbook - Historical Supplement 1997. New York, United States of America: United Nations (UN)

129 Mongolia Vial Registration Live Births Data 1989 as it appears in United Nations Statistics Division (UNSD), United Nations Demographic Yearbook - Historical Supplement 1997. New York, United States of America: United Nations (UN)

130 Mongolia World Poll 2007 as it appears in Gallup, Gallup Analytics - World Poll Negative Experience Index. Washington, D.C., United States: Gallup, 2019

131 Mongolia World Poll 2008 as it appears in Gallup, Gallup Analytics - World Poll Negative Experience Index. Washington, D.C., United States: Gallup, 2019

132 Mongolia World Poll 2010 as it appears in Gallup, Gallup Analytics - World Poll Negative Experience Index. Washington, D.C., United States: Gallup, 2019

133 Mongolia World Poll 2013 as it appears in Gallup, Gallup Analytics - World Poll Negative Experience Index. Washington, D.C., United States: Gallup, 2019

134 Mongolia World Poll 2014 as it appears in Gallup, Gallup Analytics - World Poll Negative Experience Index. Washington, D.C., United States: Gallup, 2019

135 Mongolia World Poll 2015 as it appears in Gallup, Gallup Analytics - World Poll Negative Experience Index. Washington, D.C., United States: Gallup, 2019

136 Mongolia World Poll 2016 as it appears in Gallup, Gallup Analytics - World Poll Negative Experience Index. Washington, D.C., United States: Gallup, 2019

137 Mongolia World Poll 2017 as it appears in Gallup, Gallup Analytics - World Poll Negative Experience Index. Washington, D.C., United States: Gallup, 2019

138 Mongolia World Poll 2018 as it appears in Gallup, Gallup Analytics - World Poll Negative Experience Index. Washington, D.C., United States: Gallup, 2019

139 Morocco National Survey of Iron Deficiency, Use of Iodized Salt, and Vitamin A Supplementation 2000 as it appears in World Health Organization (WHO), WHO Global Database on Anemia, Nutrition Landscape Information System. Geneva, Switzerland: World Health Organization (WHO)

140 National Statistical Office of Mongolia, Minnesota Population Center. Mongolia Population and Housing Census 1989 from the Integrated Public Use Microdata Series, International. [Machine-readable database]. Minneapolis: University of Minnesota

141 National Statistical Office of Mongolia, Minnesota Population Center. Mongolia Population and Housing Census 2000 from the Integrated Public Use Microdata Series, International. [Machine-readable database]. Minneapolis: University of Minnesota

142 National Statistical Office of Mongolia, Statistics Department of Khuvsgul Aimag (Mongolia), United Nations Children's Fund (UNICEF), Mongolia - Khuvsgul Multiple Indicator Cluster Survey 2012. New York, United States of America: United Nations Children's Fund (UNICEF), 2015

143 National Statistical Office of Mongolia, Statistics Department of Govisumber Aimag (Mongolia), United Nations Children's Fund (UNICEF), Mongolia - Nalakh District Multiple Indicator Cluster Survey 2012. New York, United States of America: United Nations Children's Fund (UNICEF), 2018

144 National Statistical Office of Mongolia, United Nations Children's Fund (UNICEF), Mongolia - Khavsgul Multiple Indicator Cluster Survey 2016. New York, United States of America: United Nations Children's Fund (UNICEF), 2018

145 National Statistical Office of Mongolia, United Nations Children's Fund (UNICEF), Mongolia - Nalakh District Multiple Indicator Cluster Survey 2016. New York, United States of America: United Nations Children's Fund (UNICEF), 2018

146 National Statistical Office of Mongolia, United Nations Children's Fund (UNICEF), Mongolia Multiple Indicator Cluster Survey 1996

147 National Statistical Office of Mongolia, United Nations Children's Fund (UNICEF), Mongolia Multiple Indicator Cluster Survey 2005. New York, United States of America: United Nations Children's Fund (UNICEF)

148 National Statistical Office of Mongolia, United Nations Children's Fund (UNICEF), Mongolia Multiple Indicator Cluster Survey 2010. New York, United States of America: United Nations Children's Fund (UNICEF), 2013

149 National Statistical Office of Mongolia, Mongolia Birth Rates by Age of Mother, Ulaanbaatar, Mongolia: National Statistical Office of Mongolia

150 National Statistical Office of Mongolia, Mongolia Multiple Indicator Cluster Survey 2000. New York, United States of America: United Nations Children's Fund (UNICEF)

151 National Statistical Office of Mongolia, Mongolia Statistical Yearbook 2001. Ulaanbaatar, Mongolia: National Statistical Office of Mongolia, 2002

152 National Statistical Office of Mongolia, Mongolia Statistical Yearbook 2002. Ulaanbaatar, Mongolia: National Statistical Office of Mongolia

153 National Statistical Office of Mongolia, Mongolia Statistical Yearbook 2003

154 National Statistical Office of Mongolia, Mongolia Statistical Yearbook 2004. Ulaanbaatar, Mongolia: National Statistical Office of Mongolia, 2005

155 National Statistical Office of Mongolia, Mongolia Statistical Yearbook 2005. Ulaanbaatar, Mongolia: National Statistical Office of Mongolia, 2006

156 Nyambai B, Ganuuya S, Batwanchudaw R, Wajsinghe P, Abeyasinghe N, Galagoda G, Kirkwood C, Bogdanovic-Sakan N, Kang Jo, Kilgore PE. Epidemiology of rotavirus diarrhea in Mongolia and Sri Lanka, March 2005-February 2007. *J Infect Dis*. 2009; 200(Suppl 1): 160-166

157 Osoo O, Saw YM, Serewen E, Yadamantse A, Karim T, Yamamoto E, Hamaguchi A, Kariu T, Hasegawa K, Akashiba M, Chimedregzen L, Narantuya E, Hoshino H, Hino K, Kagawa Y, Okamoto H. High prevalence of antibodies to hepatitis A and E viruses and viraemia of hepatitis B, C, and D viruses among apparently healthy populations in Mongolia. *Clin Diagn Lab Immunol*. 2004; 11(2): 392-8

158 Oyunsuren T, Kurbanov F, Tanaka Y, Elkady A, Sandajav R, Khajisuren O, Dagvadorj R, Muozkami M. High frequency of hepatocellular carcinoma in Mongolia: association with mono-, or co-infection with hepatitis C, B, and delta viruses. *J Med Virol*. 2006; 78(12): 1688-95

159 Pew Research Center. The Future of the Global Muslim Population. Washington, DC, United States: Pew Research Center, 2011

160 Popovs V, Lange S, Probst C, Gmel G. Centre for Addiction and Mental Health (Canada). Estimation of national, regional and global prevalence of alcohol use during pregnancy and fetal alcohol syndrome: a systematic review and meta-analysis. *Lancet Glob Health*. [Forthcoming]

161 Public Health Institute, Ministry of Health (Mongolia), United Nations Children's Fund (UNICEF), Mongolia National Nutrition Survey 2004

162 Pullan RL, Smith LJ, Jaisarasa R, Brooker SJ. Global numbers of infection and disease burden of soil transmitted helminth infections in 2010 [Unpublished data]. Parasit Factors. 2014; 7(37). [Unpublished data as provided by the Global Burden of Disease 2010 soil transmitted helminths expert group]

163 Samdan A, Gombol S, Gintter O, Onosso S, Javandran S, Abdal J, Aker A, Gakhov S, Kikvidze C, Fox N, Nyambai B. Hospital-based surveillance for rotavirus diarrhea in Ulaanbaatar, April 2009 through March 2016. *Vaccine*. 2018

164 Scott S, Alanessee D, Soubhyer D, Nymadawa P, Bulgan D, Mensekhan J, Watt JP, Slack MP, Carvalho MG, Hajjeh R, Edmond KM. Impact of Haemophilus influenzae Type b conjugate vaccine in Mongolia: prospective population-based surveillance, 2002-2010. *J Pediatr*. 2013; 163(1 Suppl): S8-S11

165 Shadick G, Thomas ML. Particulate Matter 2.5 and 10 Surface Monitor Station Expanded Database 2008-2017. [Unpublished]

166 Savd J, Gereb B, Oigooloo H, Purevsuren D, Zoljaya H, Bogle G, King H. Glucose intolerance and associated factors in Mongolia: results of a national survey. *Diabet Med*. 2002; 19(6): 502-8

167 Takahashi M, Nishizawa T, Gotanda Y, Tsuda F, Komatsu F, Kawabuchi T, Hasegawa K, Akashiba M, Chimedregzen L, Narantuya E, Hoshino H, Hino K, Kagawa Y, Okamoto H. High prevalence of antibodies to hepatitis A and E viruses and viraemia of hepatitis B, C, and D viruses among apparently healthy populations in Mongolia. *Clin Diagn Lab Immunol*. 2004; 11(2): 392-8

168 Tasterlal-Od B, Takahashi M, Endo K, Agimam D, Bayankhuu O, Okamoto H. Comparison of hepatitis A and E virus infections among healthy children in Mongolia: evidence for infection with a subgroup type IA HAV in children. *J Med Virol*. 2007; 79(1): 18-25

169 Tasterlal-Od B, Takahashi M, Nishizawa T, Endo K, Inoue J, Okamoto H. High prevalence of dual or triple infection of hepatitis B, C, and delta viruses among patients with chronic liver disease in Mongolia. *J Med Virol*. 2005; 77(4): 491-9

170 Tserenpungba B, Oyubling L, Nelson K, McNutt LA. Prevalence of infectious diseases among Mongolian blood donors. *J Infect Dev Ctries*. 2006; 2(1): 73-5

171 United Nations Children's Fund (UNICEF), World Health Organization (WHO), WHO and UNICEF Reported Disease Incidence Time Series, Geneva, Switzerland: World Health Organization (WHO)

172 United Nations Children's Fund (UNICEF), World Health Organization (WHO), WHO and UNICEF Reported Child Population, Number of Doses Administered and Official Coverage 1966-2018. Geneva, Switzerland: World Health Organization (WHO), 2019

173 United Nations Children's Fund (UNICEF), UNICEF Maternal and Newborn Health Coverage Database as of November 2019. New York, United States of America: United Nations Children's Fund (UNICEF), 2019

174 United Nations Children's Fund (UNICEF), UNICEF State of the World's Children 2017. New York, United States: United Nations Children's Fund (UNICEF), 2017

175 United Nations Environment Programme. Leaded Petrol Phase-out: Global Status, March 2018. Nairobi, Kenya: United Nations Environment Programme

176 United Nations Office on Drugs and Crime (UNODC), United Nations Office on Drugs and Crime Global Study on Homicide 2011. Vienna, Austria: United Nations Office on Drugs and Crime (UNODC), 2011

177 United Nations Office on Drugs and Crime (UNODC), World Drug Report 2012. Vienna, Austria: United Nations Office on Drugs and Crime (UNODC), 2012

178 United Nations Population Division. Abortion Policies: A Global Review. New York, United States: United Nations (UN), 2002

179 United Nations Population Division. World Abortion Policies 2007. New York, United States: United Nations (UN), 2007

180 United Nations Population Division. World Abortion Policies 2013. New York, United States: United Nations (UN), 2013

181 United Nations Statistics Division (UNSD), National Accounts Main Aggregates Database. New York City, United States of America: United Nations Statistics Division (UNSD)

182 United Nations Statistics Division (UNSD), United Nations Demographic Yearbook - Historical Supplement 1997. New York, United States of America: United Nations (UN)

183 United Nations Statistics Division (UNSD), United Nations Demographic Yearbook 2001. New York, United States: United Nations (UN), 2003

184 United Nations Statistics Division (UNSD), United Nations Demographic Yearbook 2002. New York, United States: United Nations (UN), 2005

185 United Nations Statistics Division (UNSD), United Nations Demographic Yearbook 2004. New York, United States: United Nations (UN), 2007

186 United Nations Statistics Division (UNSD), United Nations Demographic Yearbook 2006. New York, United States: United Nations (UN), 2008

187 United Nations Statistics Division (UNSD), United Nations Demographic Yearbook 2007. New York, United States: United Nations (UN), 2009

188 United Nations Statistics Division (UNSD), United Nations Demographic Yearbook 2009-2010. New York, United States: United Nations (UN), 2011

189 United Nations Statistics Division (UNSD), United Nations Demographic Yearbook 2013. New York, United States: United Nations (UN), 2014

190 United Nations Statistics Division (UNSD), United Nations Demographic Yearbook 2014. New York, United States: United Nations (UN), 2015

191 United Nations Statistics Division (UNSD), United Nations Demographic Yearbook 2015. New York, United States of America: United Nations (UN), 2016

192 United Nations Statistics Division (UNSD), United Nations Demographic Yearbook 2016. New York, United States of America: United Nations (UN), 2017

193 United Nations Statistics Division (UNSD), United Nations Demographic Yearbook. New York City, United States: United Nations Statistics Division (UNSD)

194 Uurintuya M, Ulzhiybar D, Bayarmaa D. Epilepsy in Mongolia. *Neurology Asia*. 2007; 12: 61-63

195 Wang Y, Peng R, Ma R. Epidemiological investigation of osteoarthritis in middle-aged mongolian and senior residents of the inner mongolia autonomous region. *Iran Red Crescent Med J*. 2013; 15(10): e8303

196 World Bank. World Development Indicators - Gross Domestic Product (GDP). Washington DC, United States of America: World Bank

197 World Bank. World Development Indicators - Hospital Beds (per 1,000 People). Washington DC, United States: World Bank

198 World Bank. World Development Indicators - Vitamin A Supplementation Coverage Rate. Washington DC, United States: World Bank

199 World Health Organization (WHO), Ministry of Health (Mongolia), National Medical Research Institute (Mongolia), Health Sciences University (Mongolia), National Oncology Center of Mongolia (Mongolia), Mongolia STEPS Noncommunicable Disease Risk Factors Survey 2005

200 World Health Organization (WHO), Ministry of Health (Mongolia), National Medical Research Institute (Mongolia), Health Sciences University (Mongolia), National Oncology Center of Mongolia (Mongolia), Mongolia STEPS Noncommunicable Disease Risk Factors Survey 2009

201 World Health Organization (WHO), Country Mortality Data 1980-1999

202 World Health Organization (WHO), Global leprosy situation, 2005. *Wkly Epidemiol Rec*. 2005; 80(34): 289-95

203 World Health Organization (WHO), Global leprosy situation, 2006. *Wkly Epidemiol Rec*. 2006; 81(22): 1909-16

204 World Health Organization (WHO), Global leprosy situation, 2007. *Wkly Epidemiol Rec*. 2007; 82(25): 2252-32

205 World Health Organization (WHO), Global leprosy situation, 2009. *Wkly Epidemiol Rec*. 2009; 84(33): 333-40

206 World Health Organization (WHO), Global leprosy situation, 2010. *Wkly Epidemiol Rec*. 2010; 85(35): 337-48

207 World Health Organization (WHO), Global leprosy situation, beginning of 2008. *Wkly Epidemiol Rec*. 2008; 83(33): 293-300

208 World Health Organization (WHO), Global leprosy update, 2013: reducing disease burden. *Wkly Epidemiol Rec*. 2014; 89(36): 389-400

209 World Health Organization (WHO), Global leprosy update, 2014: need for early case detection. *Wkly Epidemiol Rec*. 2015; 90(36): 461-74

210 World Health Organization (WHO), Global leprosy update on the 2012 situation. *Wkly Epidemiol Rec*. 2013; 88(5): 365-79

211 World Health Organization (WHO), Global Status Report on Road Safety 2009. Geneva, Switzerland: World Health Organization (WHO), 2009

212 World Health Organization (WHO), Global Status Report on Road Safety 2013. Geneva, Switzerland: World Health Organization (WHO), 2013

213 World Health Organization (WHO), Global Status Report on Road Safety 2015. Geneva, Switzerland: World Health Organization (WHO), 2015

214 World Health Organization (WHO), Global Status Report on Road Safety 2018. Geneva, Switzerland: World Health Organization (WHO), 2018

215 World Health Organization (WHO), Leprosy update, 2011. *Wkly Epidemiol Rec*. 2011; 86(36): 389-99

216 World Health Organization (WHO), WHO Distribution of Measles Cases by Country and by Month 2011-2020

217 World Health Organization (WHO), WHO Global Database on Child Growth and Malnutrition - Historical. Geneva, Switzerland: World Health Organization (WHO)

218 World Health Organization (WHO), WHO Global Database on Child Growth and Malnutrition. Geneva, Switzerland: World Health Organization (WHO)

219 World Health Organization (WHO), WHO Global Database on Vitamin A Deficiency. Geneva, Switzerland: World Health Organization (WHO)

220 World Health Organization (WHO), WHO Global Health Expenditure Database - National Health Accounts Indicators. Geneva, Switzerland: World Health Organization (WHO)

221 World Health Organization (WHO), WHO Global Health Observatory - Cholera: Number of Reported Cases by Country. Geneva, Switzerland: World Health Organization (WHO)

222 World Health Organization (WHO), WHO Global Health Observatory - Recorded Alcohol Per Capita Consumption 1960-1979. Geneva, Switzerland: World Health Organization (WHO)

223 World Health Organization (WHO), WHO Global Health Observatory - Recorded Alcohol Per Capita Consumption 1980-1999. Geneva, Switzerland: World Health Organization (WHO)

224 World Health Organization (WHO), WHO Global Health Observatory - Recorded Alcohol Per Capita Consumption 2000-2009 by country. Geneva, Switzerland: World Health Organization (WHO)

225 World Health Organization (WHO), WHO Global Health Observatory (GHO) Data - Hospital Bed Surveys Data by Country. Geneva, Switzerland: World Health Organization (WHO)

226 World Health Organization (WHO), WHO Global Project on Anti-Tuberculosis Drug Resistance Surveillance Data 1988-2015

227 World Health Organization (WHO), WHO International Travel and Health, Annex 1, Countries With Risk of Yellow Fever Transmission and Countries Requiring Yellow Fever Vaccination 2017 Update. Geneva, Switzerland: World Health Organization (WHO), 2017

228 World Health Organization (WHO), WHO Mortality Database Version April 2018. Geneva, Switzerland: World Health Organization (WHO), 2018

229 World Health Organization (WHO), WHO Mortality Database Version March 2017. Geneva, Switzerland: World Health Organization (WHO), 2017

230 World Health Organization (WHO), WHO Mortality Database Version September 2016. Geneva, Switzerland: World Health Organization (WHO), 2016

231 World Health Organization (WHO). WHO Tuberculosis Case Notifications. Geneva, Switzerland: World Health Organization (WHO)

232 World Health Organization (WHO). Global leprosy update, 2017: reducing the disease burden due to leprosy. *Wkly Epidemiol Rec*. 2018; 93(35): 445-56

233 World Health Organization Regional Office for the Western Pacific (WPRO-WHO). Number of Reported Cases of Dengue Fever and Dengue Hemorrhagic Fever in the Western Pacific Region, by Country 2000. Manila, Philippines: World Health Organization Regional Office for the Western Pacific (WPRO-WHO)

234 World Health Organization Regional Office for the Western Pacific (WPRO-WHO). Number of Reported Cases of Dengue Fever and Dengue Hemorrhagic Fever in the Western Pacific Region, by Country 2001. Manila, Philippines: World Health Organization Regional Office for the Western Pacific (WPRO-WHO)

235 World Health Organization Regional Office for the Western Pacific (WPRO-WHO). Number of Reported Cases of Dengue Fever and Dengue Hemorrhagic Fever in the Western Pacific Region, by Country 2002. Manila, Philippines: World Health Organization Regional Office for the Western Pacific (WPRO-WHO)

236 World Health Organization Regional Office for the Western Pacific (WPRO-WHO). Number of Reported Cases of Dengue Fever and Dengue Hemorrhagic Fever in the Western Pacific Region, by Country 2003. Manila, Philippines: World Health Organization Regional Office for the Western Pacific (WPRO-WHO)

237 World Health Organization Regional Office for the Western Pacific (WPRO-WHO). Number of Reported Cases of Dengue Fever and Dengue Hemorrhagic Fever in the Western Pacific Region, by Country 2004. Manila, Philippines: World Health Organization Regional Office for the Western Pacific (WPRO-WHO)

238 World Health Organization Regional Office for the Western Pacific (WPRO-WHO). Number of Reported Cases of Dengue Fever and Dengue Hemorrhagic Fever in the Western Pacific Region, by Country 2005. Manila, Philippines: World Health Organization Regional Office for the Western Pacific (WPRO-WHO)

239 World Health Organization Regional Office for the Western Pacific (WPRO-WHO). Number of Reported Cases of Dengue Fever and Dengue Hemorrhagic Fever in the Western Pacific Region, by Country 2006. Manila, Philippines: World Health Organization Regional Office for the Western Pacific (WPRO-WHO)

240 World Health Organization Regional Office for the Western Pacific (WPRO-WHO). Number of Reported Cases of Dengue Fever and Dengue Hemorrhagic Fever in the Western Pacific Region, by Country 2009. Manila, Philippines: World Health Organization Regional Office for the Western Pacific (WPRO-WHO)

241 World Health Organization Regional Office for the Western Pacific (WPRO-WHO). Number of Reported Cases of Dengue Fever and Dengue Hemorrhagic Fever in the Western Pacific Region, by Country 2010. Manila, Philippines: World Health Organization Regional Office for the Western Pacific (WPRO-WHO)

242 World Health Organization Regional Office for the Western Pacific (WPRO-WHO). WPRO-WHO Health Information and Intelligence Platform - Antenatal Care Coverage - At Least 1 Visit. Manila, Philippines: World Health Organization Regional Office for the Western Pacific (WPRO-WHO)

243 Yadavareen B, Meraldi M, Davandori J, Requeno JH, Betrán AP, Ahmad A, Nymalawa P, Erkenbattar T, Barcelona D, Ba-Thike K, Hagan KJ, Prado R, Wagner W, Khishgee S, Sodnompi T, Tiedmaa B, Ino B, Govind SR, Purevsuren G, Tsevelmaa B, Soyolhoya B, Johnson BR, Fajans P, Van Look PF, Otgonbold A. Tracking Maternal Mortality Declines in Mongolia Between 1992 and 2007: The Importance of Collaboration. *Bull World Health Organ*. 2010; 88(3): 192-198

244 Zhang X, Li S, Wu S, Hao X, Guo S, Suzuki K, Yokomichi H, Yamagata Z. Prevalence of birth defects and risk-factor analysis from a population-based survey in Inner Mongolia, China. *BMC Pediatr*. 2012; 12:5

Annex 3. Healthy adjusted (HALE) and disability adjusted life expectancy (DALE): Comparison between Mongolia and Central Asian countries

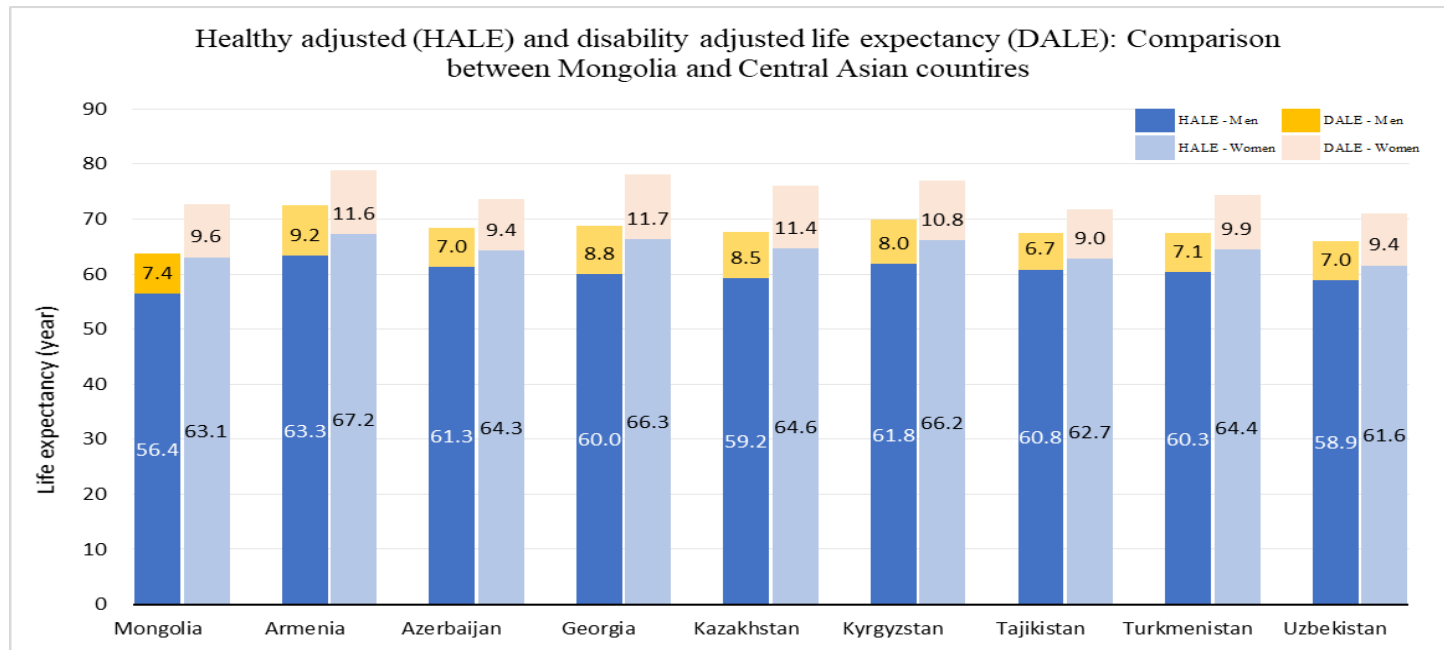

Annex 4. Under 5 Mortality during 1990 and 2019: Comparison between Mongolia and Cenral Asian Countries

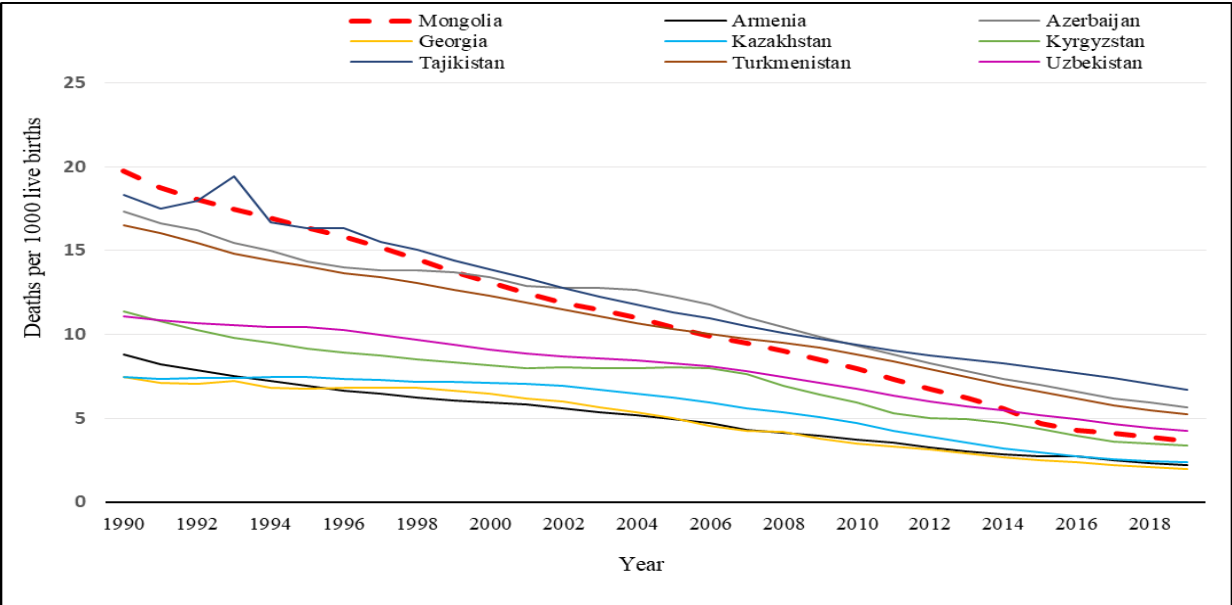

Annex 5. Age-standardized DALY rate attributable to risk factors (GBD Level 2) for men (A) and women (B) in 2019 (Complement to Figure 3)

| Risk/Cause                               | Cardiovascular diseases | Chronic respiratory diseases | Diabetes and kidney diseases | Digestive diseases   | Mental disorders | Neoplasms              | Neurological disorders | Enteric infections | HIV/AIDS and sexually transmitted infections | Maternal and neonatal disorders | Nutritional deficiencies | Respiratory infections and tuberculosis | Musculoskeletal disorders | Sense organ diseases | Substance use disorders | Transport injuries  | Self-harm and interpersonal violence | Unintentional injuries |
|------------------------------------------|-------------------------|------------------------------|------------------------------|----------------------|------------------|------------------------|------------------------|--------------------|----------------------------------------------|---------------------------------|--------------------------|-----------------------------------------|---------------------------|----------------------|-------------------------|---------------------|--------------------------------------|------------------------|
| Unsafe sex                               | 0                       | 0                            | 0                            | 0                    | 0                | 0                      | 0                      | 0                  | 19.02 (8.8-34.8)                             | 0                               | 0                        | 0                                       | 0                         | 0                    | 0                       | 0                   | 0                                    | 0                      |
| Low physical activity                    | 263.9 (84.5-624.7)      | 0                            | 14.9 (6.1-28.9)              | 0                    | 0                | 7.1 (1.8-15.0)         | 0                      | 0                  | 0                                            | 0                               | 0                        | 0                                       | 0.0                       | 0                    | 0                       | 0                   | 0                                    | 0                      |
| Childhood sexual abuse and bullying      | 0                       | 0                            | 0                            | 0                    | 42.3 (14.0-86.8) | 0                      | 0                      | 0                  | 0                                            | 0                               | 0                        | 0                                       | 0                         | 74.8 (8.8-204.7)     | 0                       | 0                   | 0                                    | 0                      |
| Low bone mineral density                 | 0                       | 0                            | 0                            | 0                    | 0                | 0                      | 0                      | 0                  | 0                                            | 0                               | 0                        | 0                                       | 0                         | 0                    | 106.8 (74.7-141.3)      | 9.3 (6.1-13.4)      | 136.7 (98.8-180.9)                   | 0                      |
| Unsafe water, sanitation and handwashing | 0                       | 0                            | 0                            | 0                    | 0                | 0                      | 210 (140.1-292.0)      | 0                  | 0                                            | 0                               | 90 (37.3-153.8)          | 0                                       | 0                         | 0                    | 0                       | 0                   | 0                                    | 0                      |
| Other environmental risks                | 548.0 (237.0-918.3)     | 0                            | 14.5 (6.4-25.0)              | 0                    | 16.1 (5.5-30.8)  | 128.3 (9.1-398.3)      | 0                      | 0                  | 0                                            | 0                               | 0                        | 0                                       | 0                         | 0                    | 0                       | 0                   | 0                                    | 0                      |
| Occupational risks                       | 0                       | 107.5 (82.1-144.9)           | 0                            | 0                    | 0                | 143.2 (86.9-222.8)     | 0                      | 0                  | 0                                            | 0                               | 0                        | 216.9 (148.8-300.4)                     | 82.9 (5.9-119.4)          | 0                    | 117.5 (91.5-149.3)      | 0                   | 165.7 (124.6-217.3)                  | 0                      |
| Drug use                                 | 0                       | 0                            | 0                            | 323.4 (185.4-506.3)  | 0                | 345.1 (179.1-606.9)    | 0                      | 21.1 (2.9-51.0)    | 0                                            | 0                               | 0                        | 0                                       | 0                         | 191.6 (145.0-245.5)  | 0                       | 0                   | 24.9 (12.1-43.8)                     | 0                      |
| Non-optimal temperature                  | 1407.1 (678.4-2371.8)   | 102 (58.7-156.4)             | 69.6 (-20.1-189.4)           | 0                    | 0                | 0                      | 0                      | 0                  | 0                                            | 0                               | 193.0 (39.8-391.7)       | 0                                       | 0                         | 0                    | 0                       | 0                   | 0                                    | 0                      |
| High fasting plasma glucose              | 1249.3 (817.7-1829.0)   | 0                            | 625.6 (499.4-772.1)          | 0                    | 0                | 77.5 (15.7-186.0)      | 15.8 (2.0-52.6)        | 0                  | 0                                            | 0                               | 0                        | 33.1 (20.2-50.7)                        | 0                         | 2.7 (0.6-6.6)        | 0                       | 0                   | 0                                    | 0                      |
| Kidney dysfunction                       | 1456.6 (1027.5-1937.5)  | 0                            | 679.9 (554.6-829.5)          | 0                    | 0                | 0                      | 0                      | 0                  | 0                                            | 0                               | 0                        | 2.9 (1.7-4.3)                           | 0                         | 0                    | 0                       | 0                   | 0                                    | 0                      |
| Child and maternal malnutrition          | 0                       | 0                            | 0                            | 0                    | 0                | 0                      | 0                      | 53.1 (22.1-106.7)  | 0                                            | 1310.5 (1026.9-1668)            | 370.6 (236.2-539.0)      | 389.8 (244.7-566.4)                     | 0                         | 0                    | 0                       | 0                   | 0                                    | 0                      |
| High LDL cholesterol                     | 4126.2 (3081.5-5348.8)  | 0                            | 0                            | 0                    | 0                | 0                      | 0                      | 0                  | 0                                            | 0                               | 0                        | 0                                       | 0                         | 0                    | 0                       | 0                   | 0                                    | 0                      |
| Air pollution                            | 4120.8 (3132.7-5401.1)  | 184.3 (127.0-260.6)          | 79.8 (53.8-111.4)            | 0                    | 0                | 333.3 (218.4-475.6)    | 0                      | 1.6 (0.3-4.3)      | 0                                            | 256.8 (61.7-472.3)              | 0                        | 262.8 (159.3-397.4)                     | 0                         | 15.4 (6.8-25.8)      | 0                       | 0                   | 0                                    | 0                      |
| High body-mass index                     | 4050.5 (2394.8-6033.4)  | 51.6 (26.5-88.0)             | 415.7 (264.5-581.0)          | 22.2 (11.1-38.7)     | 0                | 842.8 (356.8-1543.3)   | 38.8 (5.9-107.2)       | 0                  | 0                                            | 0                               | 0                        | 0                                       | 77.1 (39.1-132.9)         | 2.6 (1.0-5.1)        | 0                       | 0                   | 0                                    | 0                      |
| Dietary risks                            | 8388.7 (6515.4-10576)   | 0                            | 209.8 (143.1-286.8)          | 0                    | 0                | 553.9 (330.6-956.5)    | 0                      | 0                  | 0                                            | 0                               | 0                        | 0                                       | 0                         | 0                    | 0                       | 0                   | 0                                    | 0                      |
| Tobacco                                  | 4918.3 (3858.5-6244.2)  | 416.9 (335.4-547.4)          | 96.9 (69.9-127.5)            | 108.1 (81.6-146.1)   | 0                | 2664.3 (2025.4-3446.6) | 84.6 (24.7-218.5)      | 0                  | 0                                            | 0                               | 0                        | 476.4 (355.8-616.1)                     | 242.3 (163.2-332.7)       | 7.8 (5.1-11.4)       | 0                       | 16.9 (10.7-24.6)    | 1.6 (0.9-2.4)                        | 25.9 (17.5-37.1)       |
| High systolic blood pressure             | 9392.5 (7315.5-11785.3) | 0                            | 345.4 (263.9-444.1)          | 0                    | 0                | 0                      | 0                      | 0                  | 0                                            | 0                               | 0                        | 0                                       | 0                         | 0                    | 0                       | 0                   | 0                                    | 0                      |
| Alcohol use                              | 984.9 (466.3-1630.1)    | 0                            | 9.7 (-5.9-27.2)              | 1764.4 (1247.9-2381) | 0                | 1615.1 (1147.7-2221.6) | 67.3 (37.8-106.7)      | 0                  | 0                                            | 0                               | 0                        | 367.3 (249.1-508.0)                     | 0                         | 0                    | 1954.4 (1033.8-2509.3)  | 233.6 (129.3-355.2) | 482.1 (296.4-711.9)                  | 254.1 (112.1-458.0)    |

Numbers in brackets indicates 95% UI.



Annex 6. YLLs, YLDs and DALYs of GBD Level 3 causes attributable to the top 3 risk factors (A-Alcohol use, B- Dietary risk, C - High systolic blood pressure) in 2019

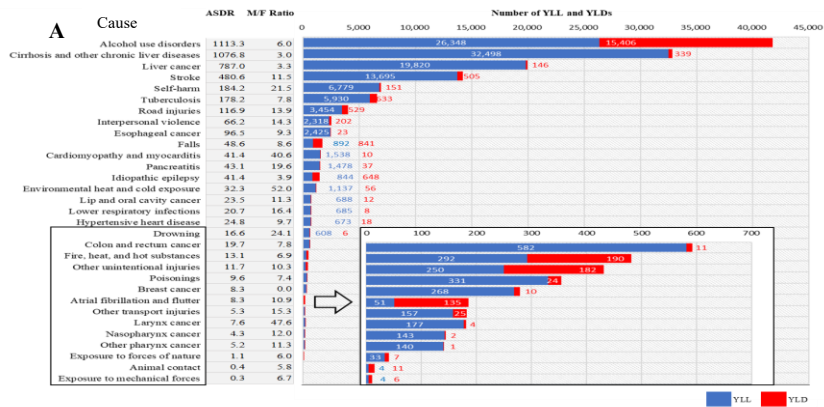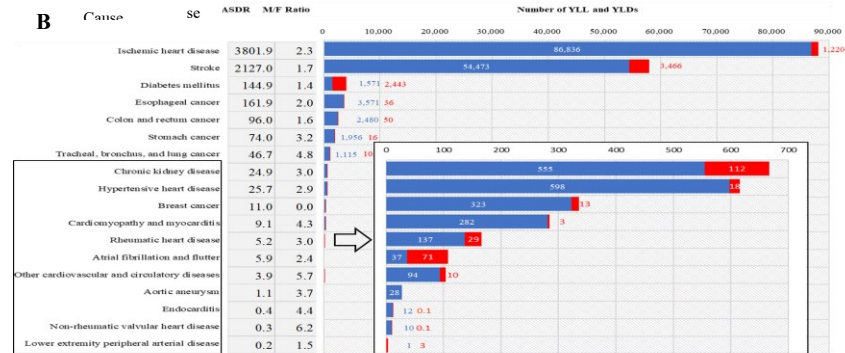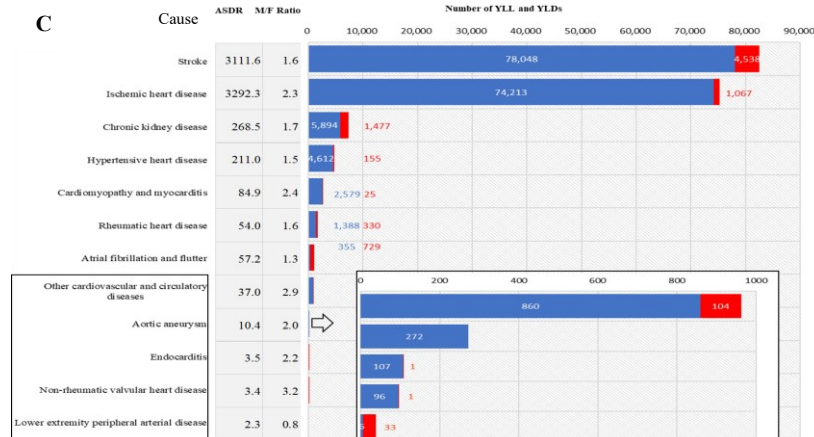

ASDR - Age-standardized rate of DALY

M/F Ratio - Male-to-female ratio

Annex 7. The burden of three top risk factors in Mongolia - All cause death, YLL, YLD and DALY, 2019

| Risk factors <sup>1</sup><br>(Level 3) <sup>2</sup> | Measures | All ages |        |            | 15-49                  |        |            | 50-69              |         |            | 70+                |         |            |
|-----------------------------------------------------|----------|----------|--------|------------|------------------------|--------|------------|--------------------|---------|------------|--------------------|---------|------------|
|                                                     |          | #        | AStR   | M/F ratio  | # (%) <sup>3</sup>     | ASpR   | M/F ratio  | # (%) <sup>3</sup> | ASpR    | M/F ratio  | # (%) <sup>3</sup> | ASpR    | M/F ratio  |
| Alcohol use                                         | Death    | 3,340    | 123.2  | <b>4.6</b> | 1,354 ( <b>40.5</b> )  | 74.9   | <b>7.4</b> | 1,489 (44.6)       | 307.6   | <b>4.6</b> | 495 (14.8)         | 591.7   | <b>3.4</b> |
|                                                     | YLL      | 121,914  | 3816.4 | <b>5.4</b> | 67,803 ( <b>55.6</b> ) | 3750.9 | <b>7.5</b> | 46,485 (38.1)      | 9605.6  | <b>4.8</b> | 7,435 (6.1)        | 8890.6  | <b>3.5</b> |
|                                                     | YLD      | 20,071   | 560.9  | <b>5</b>   | 15,658 ( <b>78.0</b> ) | 866.2  | <b>4.4</b> | 3,958 (19.7)       | 817.9   | <b>7.3</b> | 414 (2.1)          | 494.7   | <b>7.9</b> |
|                                                     | DALYs    | 141,985  | 4377.3 | <b>5.3</b> | 83,461 ( <b>58.8</b> ) | 4617.1 | <b>6.7</b> | 50,443 (35.5)      | 10423.6 | <b>4.9</b> | 7,849 (5.5)        | 9385.2  | <b>3.6</b> |
| Dietary risk                                        | Death    | 5,788    | 322.8  | 1.8        | 979 (16.9)             | 54.2   | 2.4        | 2,569 (44.4)       | 530.8   | 2.3        | 2,240 (38.7)       | 2678.9  | 1.5        |
|                                                     | YLL      | 154,076  | 6265.2 | 2.1        | 45,874 (29.8)          | 2537.8 | 2.4        | 78,195 (50.8)      | 16158.2 | 2.4        | 30,007 (19.5)      | 35881.9 | 1.6        |
|                                                     | YLD      | 7,499    | 275.0  | 1.1        | 2,627 (35.0)           | 145.3  | 0.9        | 3,796 (50.6)       | 784.5   | 1.2        | 1,075 (14.3)       | 1286.1  | 1.1        |
|                                                     | DALYs    | 161,575  | 6540.2 | 2.0        | 48,502 (30.0)          | 2683.1 | 2.3        | 81,991 (50.7)      | 16942.7 | 2.3        | 31,083 (19.2)      | 37167.9 | 1.6        |
| High blood pressure                                 | Death    | 6,318    | 343.9  | 1.7        | 989 (15.7)             | 54.7   | 2.4        | 2,963 (46.9)       | 612.3   | 2.2        | 2,366 (37.4)       | 2828.8  | 1.4        |
|                                                     | YLL      | 168,430  | 6819.8 | 2.0        | 46,093 (27.4)          | 2549.8 | 2.4        | 90,115 (53.5)      | 18621.3 | 2.2        | 32,223 (19.1)      | 38531.2 | 1.5        |
|                                                     | YLD      | 8,459    | 316.3  | 1.2        | 2,801 (33.1)           | 154.9  | 1.1        | 4,352 (51.4)       | 899.3   | 1.3        | 1,306 (15.4)       | 1562.2  | 1.1        |
|                                                     | DALYs    | 176,889  | 7136.2 | 1.9        | 48,894 (27.6)          | 2704.8 | 2.3        | 94,467 (53.4)      | 19520.6 | 2.2        | 33,529 (19.0)      | 40093.3 | 1.5        |

1) Top 2 risks (dietary risk and high systolic blood pressure) in terms of contribution to age-standardized mortality rate and 1 risk (alcohol use) with largest percentage change during 1990-2019

2) List of GBD Level 2 risk can be found in Reference# 10.

3) Percentage of total death, YLL, YLD and DALY due to respective risk factors

AStR - Age-standardized rate

ASpR - Age-specific rate

M/F - Male-to-Female

Numbers in Bold - Points emphasized in manuscript

Annex 8. 20 leading causes of YLDs with percentage changes from 1990 and 2019

| Causes of Deaths <sup>1</sup>    | MEN      |      |          |                    |                           |                                  | WOMEN    |      |         |                    |                           |                                  |
|----------------------------------|----------|------|----------|--------------------|---------------------------|----------------------------------|----------|------|---------|--------------------|---------------------------|----------------------------------|
|                                  | YLD Rank |      | YLD      |                    | Age-standardized YLD rate |                                  | YLD Rank |      | YLD     |                    | Age-standardized YLD rate |                                  |
|                                  | 1990     | 2019 | #        | % of all cause YLD | per 100 000 (95% UI)      | % change 1990-2019 (95% UI)      | 1990     | 2019 | #       | % of all cause YLD | per 100 000 (95% UI)      | % change 1990-2019 (95% UI)      |
| Alcohol use disorders            | 6        | 1    | 12493.1  | 8.5                | 703.0<br>(478 to 999)     | <b>98.0</b><br>(72.4 to 124.7)   | 2        | 1    | 14292.0 | 8.3                | 873.0<br>(617 to 1165)    | -4.9<br>(-9.9 to 0.5)            |
| Low back pain                    | 2        | 2    | 11308.9  | 7.7                | 762.5<br>(538 to 1026)    | -4.5<br>(-10.0 to 1.1)           | 1        | 2    | 13946.2 | 8.1                | 826.9<br>(563 to 1148)    | -3.7<br>(-10.7 to 4.2)           |
| Depressive disorders             | 3        | 3    | 8926.1   | 6.1                | 553.2<br>(379 to 763)     | 3.4<br>(-4.6 to 11.9)            | 3        | 3    | 13652.1 | 8.0                | 727.2<br>(494 to 1022)    | <b>-4.6</b><br>(-8.3 to -0.9)    |
| Falls                            | 7        | 4    | 7208.3   | 4.9                | 464.9<br>(325 to 657)     | <b>26.7</b><br>(21.9 to 31.6)    | 4        | 4    | 12604.7 | 7.4                | 714.0<br>(460 to 1022)    | 0.3<br>(-3.6 to 4.2)             |
| Headache disorders               | 4        | 5    | 6979.2   | 4.7                | 414.7<br>(104 to 856)     | -0.2<br>(-5.5 to 4.5)            | 7        | 5    | 6273.1  | 3.7                | 451.1<br>(305 to 635)     | <b>-4.1</b><br>(-8.5 to -0.2)    |
| Dietary iron deficiency          | 1        | 6    | 5850.9   | 4.0                | 355.4<br>(225 to 527)     | <b>-39.3</b><br>(-52.2 to -23.0) | 8        | 6    | 5965.7  | 3.5                | 393.0<br>(246 to 588)     | <b>-3.8</b><br>(-7.2 to -0.7)    |
| Age-related and other hearing lo | 5        | 7    | 5712.7   | 3.9                | 473.5<br>(317 to 676)     | <b>-4.8</b><br>(-9.3 to -0.6)    | 5        | 7    | 5910.3  | 3.4                | 345.9<br>(218 to 522)     | <b>-44.3</b><br>(-57.1 to -30.7) |
| Exposure to mechanical forces    | 8        | 8    | 5014.2   | 3.4                | 316.9<br>(213 to 458)     | <b>-5.6</b><br>(-10.1 to -1.2)   | 6        | 8    | 5551.0  | 3.2                | 321.0<br>(182 to 532)     | 0.5<br>(-3.1 to 4.1)             |
| Oral disorders                   | 9        | 9    | 4486.6   | 3.1                | 340.9<br>(205 to 531)     | <b>-4.5</b><br>(-8.2 to -0.7)    | 10       | 9    | 4783.8  | 2.8                | 274.7<br>(181 to 391)     | -2.9<br>(-10.2 to 4.4)           |
| Neonatal disorders               | 16       | 10   | 4088.0   | 2.8                | 227.8<br>(172 to 292)     | <b>106.0</b><br>(49.3 to 172.9)  | 14       | 10   | 4474.2  | 2.6                | 273.1<br>(191 to 385)     | <b>14.8</b><br>(9.8 to 20.0)     |
| Road injuries                    | 13       | 11   | 3862.9   | 2.6                | 246.9<br>(176 to 331)     | <b>15.2</b><br>(11.2 to 19.4)    | 11       | 11   | 4281.9  | 2.5                | 311.5<br>(212 to 440)     | <b>-14.4</b><br>(-18.4 to -9.8)  |
| Schizophrenia                    | 17       | 12   | 3224.5   | 2.2                | 182.5<br>(128 to 243)     | 4.4<br>(-7.6 to 17.9)            | 9        | 12   | 3945.7  | 2.3                | 252.3<br>(167 to 358)     | 2.2<br>(-8.1 to 13.2)            |
| Blindness and vision impairmen   | 11       | 13   | 3204.1   | 2.2                | 312.0<br>(215 to 430)     | <b>-16.8</b><br>(-21.4 to -12.1) | 12       | 13   | 3942.7  | 2.3                | 260.7<br>(183 to 331)     | <b>-22.5</b><br>(-28.5 to -16.2) |
| Stroke                           | 18       | 14   | 3054.0   | 2.1                | 232.9<br>(166 to 296)     | -5.9<br>(-13.0 to 1.7)           | 17       | 14   | 3717.6  | 2.2                | 208.3<br>(154 to 269)     | <b>94.3</b><br>(41.4 to 162.4)   |
| Dermatitis                       | 10       | 15   | 2889.4   | 2.0                | 167.4<br>(94 to 269)      | 0.2<br>(-5.0 to 6.0)             | 19       | 15   | 3627.4  | 2.1                | 215.1<br>(139 to 316)     | <b>34.0</b><br>(16.7 to 57.8)    |
| Diabetes mellitus                | 32       | 16   | 2847.2   | 1.9                | 221.1<br>(143 to 311)     | <b>63.1</b><br>(50.5 to 77.0)    | 30       | 16   | 3126.4  | 1.8                | 208.4<br>(137 to 295)     | <b>50.3</b><br>(40.1 to 61.6)    |
| Diarrheal diseases               | 12       | 17   | 2663.1   | 1.8                | 154.9<br>(106 to 219)     | 6.0<br>(-5.1 to 18.5)            | 18       | 17   | 3123.9  | 1.8                | 168.1<br>(115 to 222)     | 3.8<br>(-7.8 to 16.7)            |
| Anxiety disorders                | 15       | 18   | 2541.8   | 1.7                | 155.4<br>(103 to 218)     | 1.4<br>(-9.4 to 13.3)            | 21       | 18   | 2917.6  | 1.7                | 210.3<br>(106 to 421)     | 3.8<br>(0.0 to 7.9)              |
| Drug use disorders               | 22       | 19   | 2501.2   | 1.7                | 140.8<br>(97 to 191)      | <b>27.9</b><br>(10.3 to 49.5)    | 24       | 19   | 2913.3  | 1.7                | 155.5<br>(104 to 226)     | <b>48.5</b><br>(26.6 to 74.9)    |
| Idiopathic epilepsy              | 14       | 20   | 2437.6   | 1.7                | 151.7<br>(38 to 302)      | 9.8<br>(-72.1 to 382.7)          | 13       | 20   | 2804.1  | 1.6                | 161.3<br>(108 to 227)     | 5.0<br>(-4.7 to 17.2)            |
| Sub total                        | NA       |      | 101293.9 | 68.9               |                           | NA                               | NA       |      | #####   | 71.1               |                           | NA                               |
| All cause Total                  |          |      | 146984.4 | 100.0              | 9707.7<br>(7221 to 12551) | -1.3<br>(-2.0 to 4.0)            |          |      | #####   | 100.0              | 10404<br>(7691 to 13517)  | <b>-5.0</b><br>(-7.0 to -2.0)    |

YLD= years lived with disability; UI= uncertainty interval; Changes in bold are statistically significant.

Annex 9. Age-standardized rate of death and YLLs attributable to different risk factors in Mongolia 2019

| #  | Risk factors                              | Deaths |       |              | YLLs   |        |              |
|----|-------------------------------------------|--------|-------|--------------|--------|--------|--------------|
|    |                                           | Men    | Women | % Difference | Men    | Women  | % Difference |
| 1  | Air pollution                             | 210.8  | 118.0 | 78.7         | 5064.0 | 2647.1 | 91.3         |
| 2  | Alcohol use                               | 220.2  | 47.6  | <b>362.5</b> | 6769.1 | 1258.8 | <b>437.7</b> |
| 3  | Child and maternal malnutrition           | 18.8   | 14.1  | 33.6         | 1663.4 | 1230.9 | 35.1         |
| 4  | Dietary risks                             | 440.6  | 243.4 | 81.0         | 8858.4 | 4262.9 | 107.8        |
| 5  | Drug use                                  | 27.1   | 8.7   | <b>209.4</b> | 757.9  | 205.7  | <b>268.4</b> |
| 6  | High body-mass index                      | 195.4  | 125.1 | 56.2         | 5103.4 | 2924.6 | 74.5         |
| 7  | High fasting plasma glucose               | 86.3   | 46.3  | 86.2         | 1718.5 | 841.8  | 104.1        |
| 8  | High LDL cholesterol                      | 192.6  | 103.5 | 86.1         | 4053.2 | 1726.6 | 134.8        |
| 9  | High systolic blood pressure              | 452.0  | 267.3 | 69.1         | 9392.0 | 4794.1 | 95.9         |
| 10 | Kidney dysfunction                        | 93.2   | 54.5  | 70.8         | 1992.7 | 1077.8 | 84.9         |
| 11 | Low bone mineral density                  | 4.8    | 2.0   | 143.8        | 138.0  | 49.2   | 180.4        |
| 12 | Low physical activity                     | 20.8   | 12.1  | 71.9         | 272.2  | 136.6  | 99.3         |
| 13 | Non-optimal temperature                   | 69.4   | 48.6  | 42.9         | 954.6  | 849.0  | 12.4         |
| 14 | Occupational risks                        | 14.8   | 2.7   | <b>446.7</b> | 439.7  | 64.3   | <b>583.9</b> |
| 15 | Other environmental risks                 | 38.1   | 13.4  | <b>184.0</b> | 671.9  | 208.5  | <b>222.2</b> |
| 16 | Unsafe sex                                | 0.3    | 12.4  | -97.8        | 9.8    | 363.6  | -97.3        |
| 17 | Unsafe water, sanitation, and handwashing | 2.8    | 2.8   | 0.0          | 159.1  | 199.0  | -20.1        |

Risk factors analyzed are GBD Level 2 risk factors

Numbers in Bold - Points emphasized in manuscript
